# Supplementary material for: Dwarf alleles differentially affect barley root traits influencing nitrogen acquisition under low nutrient supply
Source: PubMed Central journal article supplement — J Exp Bot. 2011 Apr 4;62(11):3917–27. doi: 10.1093/jxb/err089 (PMC3134348; doi:10.1093/jxb/err089), 2011-04-04
Supplement: supp_err089_00057190-file001.pdf [file supp_err089_00057190-file001.pdf]

**Dwarf allele differentially affects barley root traits influencing nitrogen acquisition under low nutrient supply.**

<sup>1</sup>Karley A. J., Valentine T. A., Squire G.

**Electronic appendix for supplementary material**

**Table S1 Mean values and ANOVA results for plant dry mass**

| Source of variation                     | <sup>1</sup> Total dry mass (g) | <sup>1</sup> Leaf dry mass (g) | <sup>1</sup> Stem dry mass (g) | <sup>1</sup> Root dry mass (g) | <sup>1</sup> Ear/Grain dry mass (g) |
|-----------------------------------------|---------------------------------|--------------------------------|--------------------------------|--------------------------------|-------------------------------------|
| <b>Stem extension</b>                   |                                 |                                |                                |                                |                                     |
| <b>(a) Standard nutrient</b>            |                                 |                                |                                |                                |                                     |
| Kenia                                   | 0.761                           | 0.201                          | 0.216                          | 0.346                          |                                     |
| Golden Promise                          | 0.479                           | 0.146                          | 0.096                          | 0.237                          |                                     |
| B83                                     | 0.575                           | 0.176                          | 0.121                          | 0.294                          |                                     |
| Westminster                             | 0.748                           | 0.196                          | 0.154                          | 0.397                          |                                     |
| Derkado                                 | 0.675                           | 0.184                          | 0.130                          | 0.361                          |                                     |
| <b>(b) <sup>2</sup>Reduced nutrient</b> |                                 |                                |                                |                                |                                     |
| Kenia                                   | 0.390                           | 0.079                          | 0.117                          | 0.193                          |                                     |
| Golden Promise                          | 0.226                           | 0.053                          | 0.054                          | 0.118                          |                                     |
| B83                                     | 0.285                           | 0.064                          | 0.050                          | 0.172                          |                                     |
| Westminster                             | 0.298                           | 0.064                          | 0.078                          | 0.155                          |                                     |
| Derkado                                 | 0.273                           | 0.057                          | 0.063                          | 0.153                          |                                     |
| <b>Anthesis</b>                         |                                 |                                |                                |                                |                                     |
| <b>(a) Standard nutrient</b>            |                                 |                                |                                |                                |                                     |
| Kenia                                   | 1.694                           | 0.272                          | 0.708                          | 0.483                          | 0.232                               |

|                              |                       |                                |                               |                                |                             |                                |
|------------------------------|-----------------------|--------------------------------|-------------------------------|--------------------------------|-----------------------------|--------------------------------|
|                              | <b>Golden Promise</b> | 1.677                          | 0.354                         | 0.541                          | 0.587                       | 0.210                          |
|                              | <b>B83</b>            | 2.294                          | 0.508                         | 0.948                          | 0.570                       | 0.268                          |
|                              | <b>Westminster</b>    | 1.478                          | 0.261                         | 0.513                          | 0.446                       | 0.257                          |
|                              | <b>Derkado</b>        | 2.012                          | 0.344                         | 0.742                          | 0.621                       | 0.305                          |
| <b>(b) Reduced nutrient</b>  |                       |                                |                               |                                |                             |                                |
|                              | <b>Kenia</b>          | 0.691                          | 0.086                         | 0.258                          | 0.259                       | 0.088                          |
|                              | <b>Golden Promise</b> | 0.522                          | 0.092                         | 0.150                          | 0.186                       | 0.094                          |
|                              | <b>B83</b>            | 0.674                          | 0.109                         | 0.227                          | 0.205                       | 0.133                          |
|                              | <b>Westminster</b>    | 0.541                          | 0.074                         | 0.198                          | 0.181                       | 0.089                          |
|                              | <b>Derkado</b>        | 0.493                          | 0.073                         | 0.192                          | 0.144                       | 0.084                          |
| <b>Maturity</b>              |                       |                                |                               |                                |                             |                                |
| <b>(a) Standard nutrient</b> |                       |                                |                               |                                |                             |                                |
|                              | <b>Kenia</b>          | 9.149                          | 0.777                         | 2.842                          | 0.764                       | 4.767                          |
|                              | <b>Golden Promise</b> | 7.826                          | 0.823                         | 1.894                          | 0.659                       | 4.449                          |
|                              | <b>B83</b>            | 9.074                          | 0.935                         | 2.174                          | 0.833                       | 5.131                          |
|                              | <b>Westminster</b>    | 9.139                          | 0.708                         | 2.418                          | 0.824                       | 5.190                          |
|                              | <b>Derkado</b>        | 8.820                          | 0.975                         | 2.443                          | 0.865                       | 4.538                          |
| <b>(b) Reduced nutrient</b>  |                       |                                |                               |                                |                             |                                |
|                              | <b>Kenia</b>          | 2.719                          | 0.248                         | 0.940                          | 0.337                       | 1.194                          |
|                              | <b>Golden Promise</b> | 3.684                          | 0.215                         | 0.666                          | 0.397                       | 1.837                          |
|                              | <b>B83</b>            | 2.384                          | 0.185                         | 0.488                          | 0.306                       | 1.405                          |
|                              | <b>Westminster</b>    | 2.360                          | 0.158                         | 0.717                          | 0.193                       | 1.293                          |
|                              | <b>Derkado</b>        | 2.090                          | 0.229                         | 0.637                          | 0.199                       | 1.025                          |
| <b>Block</b>                 |                       | F <sub>4</sub> =0.23           | F <sub>4</sub> =0.02          | F <sub>4</sub> =0.09           | F <sub>4</sub> =0.53        | F <sub>4</sub> =0.67           |
| <b>Block.Plot</b>            |                       |                                |                               |                                |                             |                                |
| <b>Growth stage</b>          |                       | F <sub>2</sub> =112.32 P<0.001 | F <sub>2</sub> =52.33 P<0.001 | F <sub>2</sub> =113.66 P<0.001 | F <sub>2</sub> =7.34 P<0.05 | F <sub>1</sub> =225.97 P<0.001 |
| <b>Residual</b>              |                       | F <sub>8</sub> =3.27           | F <sub>8</sub> =2.53          | F <sub>8</sub> =2.91           | F <sub>8</sub> =2.69        | F <sub>4</sub> =2.37           |
| <b>Block.Plot.Plant</b>      |                       |                                |                               |                                |                             |                                |

|                                      |                                |                                |                                |                                |                                |
|--------------------------------------|--------------------------------|--------------------------------|--------------------------------|--------------------------------|--------------------------------|
| <b>Nutrient</b>                      | F <sub>1</sub> =239.87 P<0.001 | F <sub>1</sub> =420.53 P<0.001 | F <sub>1</sub> =186.66 P<0.001 | F <sub>1</sub> =145.88 P<0.001 | F <sub>1</sub> =114.01 P<0.001 |
| <b>Genotype</b>                      | F <sub>4</sub> =1.10 P>0.1     | F <sub>4</sub> =1.29 P>0.1     | F <sub>4</sub> =5.44 P<0.001   | F <sub>4</sub> =0.50 P>0.1     | F <sub>4</sub> =0.52 P>0.1     |
| <b>Growthstage.Nutrient</b>          | F <sub>2</sub> =3.93 P<0.05    | F <sub>2</sub> =4.42 P<0.05    | F <sub>2</sub> =6.28 P<0.01    | F <sub>2</sub> =1.52 P>0.1     | F <sub>1</sub> =4.14 P<0.05    |
| <b>Growthstage.Genotype</b>          | F <sub>8</sub> =1.56 P>0.1     | F <sub>8</sub> =1.65 P>0.1     | F <sub>8</sub> =1.41 P>0.1     | F <sub>8</sub> =0.96 P>0.1     | F <sub>4</sub> =0.57 P>0.1     |
| <b>Nutrition.Genotype</b>            | F <sub>4</sub> =1.48 P>0.1     | F <sub>4</sub> =0.81 P>0.1     | F <sub>4</sub> =0.81 P>0.1     | F <sub>4</sub> =2.58 P<0.05    | F <sub>4</sub> =0.77 P>0.1     |
| <b>Growthstage.Nutrient.Genotype</b> | F <sub>8</sub> =0.74 P>0.1     | F <sub>8</sub> =0.22 P>0.1     | F <sub>8</sub> =0.22 P>0.1     | F <sub>8</sub> =0.96 P>0.1     | F <sub>4</sub> =0.19 P>0.1     |
| <b>Residual</b>                      | 102 df                         | 106 df                         | 106 df                         | 102 df                         | 72 df                          |
| <b>Total</b>                         | 143 df                         | 147 df                         | 147 df                         | 143 df                         | 99 df                          |

<sup>1</sup>Analysis performed on ln-transformed data

<sup>2</sup>Reduced nutrient supply was 50% of the standard nutrient supply

**Table S2 Mean values and ANOVA results for plant N content**

| Source of variation                     | <sup>1</sup> Total plant N (g) | <sup>1</sup> Leaf N (g) | <sup>1</sup> Stem N (g) | <sup>1</sup> Root N (g) | <sup>1</sup> Ear/grain N (g) |
|-----------------------------------------|--------------------------------|-------------------------|-------------------------|-------------------------|------------------------------|
| <b>Stem extension</b>                   |                                |                         |                         |                         |                              |
| <b>(a) Standard nutrient</b>            |                                |                         |                         |                         |                              |
| Kenia                                   | 0.0099                         | 0.0050                  | 0.0027                  | 0.0021                  |                              |
| Golden Promise                          | 0.0090                         | 0.0048                  | 0.0018                  | 0.0024                  |                              |
| B83                                     | 0.0096                         | 0.0051                  | 0.0021                  | 0.0024                  |                              |
| Westminster                             | 0.0102                         | 0.0058                  | 0.0019                  | 0.0026                  |                              |
| Derkado                                 | 0.0090                         | 0.0050                  | 0.0015                  | 0.0024                  |                              |
| <b>(b) <sup>2</sup>Reduced nutrient</b> |                                |                         |                         |                         |                              |
| Kenia                                   | 0.0030                         | 0.0012                  | 0.0008                  | 0.0009                  |                              |
| Golden Promise                          | 0.0022                         | 0.0010                  | 0.0005                  | 0.0007                  |                              |
| B83                                     | 0.0029                         | 0.0013                  | 0.0005                  | 0.0011                  |                              |
| Westminster                             | 0.0027                         | 0.0012                  | 0.0007                  | 0.0008                  |                              |
| Derkado                                 | 0.0024                         | 0.0012                  | 0.0006                  | 0.0007                  |                              |
| <b>Anthesis</b>                         |                                |                         |                         |                         |                              |
| <b>(a) Standard nutrient</b>            |                                |                         |                         |                         |                              |
| Kenia                                   | 0.0371                         | 0.0111                  | 0.0148                  | 0.0060                  | 0.0052                       |
| Golden Promise                          | 0.0394                         | 0.0147                  | 0.0130                  | 0.0066                  | 0.0048                       |
| B83                                     | 0.0499                         | 0.0174                  | 0.0178                  | 0.0076                  | 0.0071                       |
| Westminster                             | 0.0295                         | 0.0102                  | 0.0090                  | 0.0051                  | 0.0053                       |
| Derkado                                 | 0.0366                         | 0.0128                  | 0.0116                  | 0.0060                  | 0.0062                       |
| <b>(b) Reduced nutrient</b>             |                                |                         |                         |                         |                              |
| Kenia                                   | 0.0081                         | 0.0020                  | 0.0029                  | 0.0015                  | 0.0017                       |
| Golden Promise                          | 0.0080                         | 0.0025                  | 0.0021                  | 0.0016                  | 0.0019                       |
| B83                                     | 0.0109                         | 0.0027                  | 0.0031                  | 0.0020                  | 0.0031                       |

|                                      |                |                                |                                |                                |                                |                                |
|--------------------------------------|----------------|--------------------------------|--------------------------------|--------------------------------|--------------------------------|--------------------------------|
|                                      | Westminster    | 0.0059                         | 0.0016                         | 0.0017                         | 0.0011                         | 0.0015                         |
|                                      | Derkado        | 0.0066                         | 0.0019                         | 0.0018                         | 0.0013                         | 0.0016                         |
| <b>Maturity</b>                      |                |                                |                                |                                |                                |                                |
| <b>(a) Standard nutrient</b>         |                |                                |                                |                                |                                |                                |
|                                      | Kenia          | 0.1502                         | 0.0069                         | 0.0204                         | 0.0074                         | 0.1156                         |
|                                      | Golden Promise | 0.1198                         | 0.0079                         | 0.0098                         | 0.0057                         | 0.0964                         |
|                                      | B83            | 0.1441                         | 0.0105                         | 0.0123                         | 0.0109                         | 0.1104                         |
|                                      | Westminster    | 0.1234                         | 0.0065                         | 0.0096                         | 0.0077                         | 0.0996                         |
|                                      | Derkado        | 0.1268                         | 0.0124                         | 0.0148                         | 0.0104                         | 0.0892                         |
| <b>(b) Reduced nutrient</b>          |                |                                |                                |                                |                                |                                |
|                                      | Kenia          | 0.0347                         | 0.0027                         | 0.0046                         | 0.0034                         | 0.0239                         |
|                                      | Golden Promise | 0.0502                         | 0.0015                         | 0.0022                         | 0.0027                         | 0.0361                         |
|                                      | B83            | 0.0347                         | 0.0015                         | 0.0015                         | 0.0019                         | 0.0297                         |
|                                      | Westminster    | 0.0268                         | 0.0013                         | 0.0022                         | 0.0015                         | 0.0218                         |
|                                      | Derkado        | 0.0310                         | 0.0038                         | 0.0039                         | 0.0020                         | 0.0214                         |
| <b>Block</b>                         |                | F <sub>4</sub> =0.15           | F <sub>4</sub> =0.2            | F <sub>4</sub> =0.83           | F <sub>4</sub> =0.73           | F <sub>4</sub> =0.68           |
| <b>Block.Plot</b>                    |                |                                |                                |                                |                                |                                |
| <b>Growth stage</b>                  |                | F <sub>2</sub> =190.12 P<0.01  | F <sub>2</sub> =10.24 P<0.01   | F <sub>2</sub> =232.88 P<0.01  | F <sub>2</sub> =38.12 P<0.001  | F <sub>1</sub> =343.20 P<0.001 |
| <b>Residual</b>                      |                | F <sub>8</sub> =2.75           | F <sub>8</sub> =3.93           | F <sub>8</sub> =0.93           | F <sub>8</sub> =1.93           | F <sub>4</sub> =1.69           |
| <b>Block.Plot.Plant</b>              |                |                                |                                |                                |                                |                                |
| <b>Nutrient</b>                      |                | F <sub>1</sub> =514.16 P<0.001 | F <sub>1</sub> =629.39 P<0.001 | F <sub>1</sub> =424.21 P<0.001 | F <sub>1</sub> =351.61 P<0.001 | F <sub>1</sub> =144.86 P<0.001 |
| <b>Genotype</b>                      |                | F <sub>4</sub> =2.70 P<0.05    | F <sub>4</sub> =2.77 P<0.05    | F <sub>4</sub> =6.13 P<0.001   | F <sub>4</sub> =2.34 P<0.1     | F <sub>4</sub> =1.54 P>0.1     |
| <b>Growthstage.Nutrient</b>          |                | F <sub>2</sub> =1.75 P>0.1     | F <sub>2</sub> =2.79 P<0.1     | F <sub>2</sub> =6.04 P<0.01    | F <sub>2</sub> =2.60 P<0.1     | F <sub>1</sub> =3.81 P<0.1     |
| <b>Growthstage.Genotype</b>          |                | F <sub>8</sub> =1.55 P>0.1     | F <sub>8</sub> =2.94 P<0.01    | F <sub>8</sub> =2.84 P<0.01    | F <sub>8</sub> =0.59 P>0.1     | F <sub>4</sub> =0.91 P>0.1     |
| <b>Nutrient.Genotype</b>             |                | F <sub>4</sub> =0.70 P>0.1     | F <sub>4</sub> =1.21 P>0.1     | F <sub>4</sub> =0.79 P>0.1     | F <sub>4</sub> =2.23 P<0.1     | F <sub>4</sub> =0.65 P>0.1     |
| <b>Growthstage.Nutrient.Genotype</b> |                | F <sub>8</sub> =0.95 P>0.1     | F <sub>8</sub> =0.74 P>0.1     | F <sub>8</sub> =0.27 P>0.1     | F <sub>8</sub> =1.50 P>0.1     | F <sub>4</sub> =0.23 P>0.1     |
| <b>Residual</b>                      |                | 102 df                         | 106 df                         | 106 df                         | 102 df                         | 72 df                          |
| <b>Total</b>                         |                | 143 df                         | 147 df                         | 147 df                         | 143 df                         | 99 df                          |

<sup>1</sup>Analysis performed on ln-transformed data

<sup>2</sup>Reduced nutrient supply was 50% of the standard nutrient supply

Table S3 Mean values and ANOVA results for root investment parameters

| Source of variation                     | <sup>1</sup> Fraction of dry mass<br>in the roots | <sup>2</sup> Plant N content per unit root<br>dry mass(g N g <sup>-1</sup> root) | Root dry mass with depth fit |                            |
|-----------------------------------------|---------------------------------------------------|----------------------------------------------------------------------------------|------------------------------|----------------------------|
|                                         |                                                   |                                                                                  | <sup>2</sup> Coefficient a   | <sup>2</sup> Coefficient b |
| <b>Stem extension</b>                   |                                                   |                                                                                  |                              |                            |
| <b>(a) Standard nutrient</b>            |                                                   |                                                                                  |                              |                            |
| Kenia                                   | 0.453                                             | 0.030                                                                            | 0.0118                       | -0.0349                    |
| Golden Promise                          | 0.493                                             | 0.040                                                                            | 0.0065                       | -0.0287                    |
| B83                                     | 0.510                                             | 0.037                                                                            | 0.0095                       | -0.0256                    |
| Westminster                             | 0.529                                             | 0.026                                                                            | 0.0113                       | -0.0333                    |
| Derkado                                 | 0.527                                             | 0.027                                                                            | 0.0111                       | -0.0303                    |
| <b>(b) <sup>3</sup>Reduced nutrient</b> |                                                   |                                                                                  |                              |                            |
| Kenia                                   | 0.489                                             | 0.016                                                                            | 0.0078                       | -0.0428                    |
| Golden Promise                          | 0.523                                             | 0.019                                                                            | 0.0040                       | -0.0355                    |
| B83                                     | 0.603                                             | 0.017                                                                            | 0.0050                       | -0.0280                    |
| Westminster                             | 0.506                                             | 0.020                                                                            | 0.0053                       | -0.0361                    |
| Derkado                                 | 0.550                                             | 0.019                                                                            | 0.0064                       | -0.0381                    |
| <b>Anthesis</b>                         |                                                   |                                                                                  |                              |                            |
| <b>(a) Standard nutrient</b>            |                                                   |                                                                                  |                              |                            |
| Kenia                                   | 0.283                                             | 0.079                                                                            | 0.0152                       | -0.0319                    |
| Golden Promise                          | 0.349                                             | 0.068                                                                            | 0.0177                       | -0.0314                    |
| B83                                     | 0.241                                             | 0.099                                                                            | 0.0155                       | -0.0237                    |
| Westminster                             | 0.296                                             | 0.066                                                                            | 0.0127                       | -0.0305                    |
| Derkado                                 | 0.319                                             | 0.060                                                                            | 0.0206                       | -0.0326                    |
| <b>(b) Reduced nutrient</b>             |                                                   |                                                                                  |                              |                            |
| Kenia                                   | 0.366                                             | 0.034                                                                            | 0.0112                       | -0.0459                    |

|                                      |                       |                                |                                |                                |                               |
|--------------------------------------|-----------------------|--------------------------------|--------------------------------|--------------------------------|-------------------------------|
|                                      | <b>Golden Promise</b> | 0.352                          | 0.045                          | 0.0059                         | -0.0368                       |
|                                      | <b>B83</b>            | 0.292                          | 0.065                          | 0.0072                         | -0.0333                       |
|                                      | <b>Westminster</b>    | 0.313                          | 0.039                          | 0.0083                         | -0.0401                       |
|                                      | <b>Derkado</b>        | 0.289                          | 0.048                          | 0.0054                         | -0.0381                       |
| <b>Maturity</b>                      |                       |                                |                                |                                |                               |
| <b>(a) Standard nutrient</b>         |                       |                                |                                |                                |                               |
|                                      | <b>Kenia</b>          | 0.084                          | 0.239                          | 0.0344                         | -0.0370                       |
|                                      | <b>Golden Promise</b> | 0.076                          | 0.236                          | 0.0238                         | -0.0461                       |
|                                      | <b>B83</b>            | 0.086                          | 0.222                          | 0.0233                         | -0.0351                       |
|                                      | <b>Westminster</b>    | 0.094                          | 0.150                          | 0.0306                         | -0.0454                       |
|                                      | <b>Derkado</b>        | 0.122                          | 0.158                          | 0.0317                         | -0.0313                       |
| <b>(b) Reduced nutrient</b>          |                       |                                |                                |                                |                               |
|                                      | <b>Kenia</b>          | 0.111                          | 0.147                          | 0.0152                         | -0.0470                       |
|                                      | <b>Golden Promise</b> | 0.109                          | 0.132                          | 0.0131                         | -0.0351                       |
|                                      | <b>B83</b>            | 0.146                          | 0.125                          | 0.0112                         | -0.0344                       |
|                                      | <b>Westminster</b>    | 0.106                          | 0.130                          | 0.0068                         | -0.0385                       |
|                                      | <b>Derkado</b>        | 0.102                          | 0.158                          | 0.0082                         | -0.0345                       |
| <b>Block</b>                         |                       | F <sub>4</sub> =4.40           | F <sub>4</sub> =2.81           | F <sub>4</sub> =1.49           | F <sub>4</sub> =12.00         |
| <b>Block.Plot</b>                    |                       |                                |                                |                                |                               |
| <b>Growth stage</b>                  |                       | F <sub>2</sub> =901.05 P<0.001 | F <sub>2</sub> =497.90 P<0.001 | F <sub>2</sub> =10.36 P<0.01   | F <sub>2</sub> =15.26 P<0.005 |
| <b>Residual</b>                      |                       | F <sub>8</sub> =0.73           | F <sub>8</sub> =0.72           | F <sub>8</sub> =2.41           | F <sub>8</sub> =0.26          |
| <b>Block.Plot.Plant</b>              |                       |                                |                                |                                |                               |
| <b>Nutrient</b>                      |                       | F <sub>1</sub> =7.65 P<0.01    | F <sub>1</sub> =65.25 P<0.001  | F <sub>1</sub> =110.77 P<0.001 | F <sub>1</sub> =11.27 P<0.005 |
| <b>Genotype</b>                      |                       | F <sub>4</sub> =0.46 P>0.1     | F <sub>4</sub> =1.78 P>0.1     | F <sub>4</sub> =1.96 P>0.1     | F <sub>4</sub> =5.15 P<0.001  |
| <b>Growthstage.Nutrient</b>          |                       | F <sub>2</sub> =0.12 P>0.1     | F <sub>2</sub> =0.79 P>0.1     | F <sub>2</sub> =3.74 P<0.05    | F <sub>2</sub> =4.35 P<0.05   |
| <b>Growthstage.Genotype</b>          |                       | F <sub>8</sub> =2.41 P<0.05    | F <sub>8</sub> =1.19 P>0.1     | F <sub>8</sub> =0.83 P>0.1     | F <sub>8</sub> =0.75 P>0.1    |
| <b>Nutrient.Genotype</b>             |                       | F <sub>4</sub> =2.09 P<0.1     | F <sub>4</sub> =2.21 P<0.1     | F <sub>4</sub> =2.23 P<0.1     | F <sub>4</sub> =0.79 P>0.1    |
| <b>Growthstage.Nutrient.Genotype</b> |                       | F <sub>8</sub> =0.43 P>0.1     | F <sub>8</sub> =0.49 P>0.1     | F <sub>8</sub> =1.77 P<0.1     | F <sub>8</sub> =0.44 P>0.1    |



|                 |        |        |        |        |
|-----------------|--------|--------|--------|--------|
| <b>Residual</b> | 102 df | 102 df | 82 df  | 82 df  |
| <b>Total</b>    | 143 df | 143 df | 123 df | 123 df |

---

Analysis performed on <sup>1</sup>arcsin-squareroot-transformed data or <sup>2</sup>ln-transformed data

<sup>3</sup>Reduced nutrient supply was 50% of the standard nutrient supply
